# Supplementary material for: Enhancing Root Distribution, Nitrogen, and Water Use Efficiency in Greenhouse Tomato Crops Using Nanobubbles
Source: MDPI journal article supplement (doi:10.3390/horticulturae10050463), 2024-05-01
Supplement: s1 [file s1]

## Supplementary Materials

**Table S1.** Ion concentration of irrigation water and irrigation solutions (mmol/L). DAT: Days after transplanting. Expresses time interval with the same concentration.

|                                             | Water analysis | Days after transplanting |       |       |       |        |         |         |         |
|---------------------------------------------|----------------|--------------------------|-------|-------|-------|--------|---------|---------|---------|
|                                             |                | 0-34                     | 35-50 | 51-70 | 71-98 | 99-110 | 114-152 | 153-180 | 181-246 |
| NO <sub>3</sub> <sup>-</sup>                | 0.0            | 8.3                      | 13.8  | 11.0  | 8.2   | 11.1   | 7.7     | 8.2     | 8.2     |
| NH <sub>4</sub> <sup>+</sup>                | 0.0            | 0.5                      | 1.0   | 0.7   | 0.0   | 0.4    | 0.3     | 0.3     | 0.3     |
| H <sub>2</sub> PO <sub>4</sub> <sup>-</sup> | 0.0            | 0.0                      | 0.0   | 0.0   | 0.0   | 0.0    | 0.0     | 0.0     | 0.0     |
| K <sup>+</sup>                              | 0.2            | 0.2                      | 0.2   | 0.2   | 5.2   | 7.2    | 5.0     | 6.0     | 6.0     |
| Ca <sup>++</sup>                            | 2.7            | 5.0                      | 7.5   | 6.3   | 2.7   | 4.5    | 4.0     | 4.0     | 4.0     |
| Mg <sup>++</sup>                            | 3.1            | 3.1                      | 3.1   | 3.1   | 3.1   | 3.1    | 3.1     | 3.1     | 3.1     |
| SO <sub>4</sub> <sup>=</sup>                | 0.7            | 0.0                      | 0.0   | 0.0   | 0.0   | 1.5    | 1.5     | 1.8     | 1.8     |
| CO <sub>3</sub> <sup>=</sup>                | 0.2            | 0.0                      | 0.0   | 0.0   | 0.0   | 0.0    | 0.0     | 0.0     | 0.0     |
| HCO <sub>3</sub> <sup>-</sup>               | 3.2            | 0.5                      | 0.5   | 0.5   | 0.5   | 0.5    | 0.5     | 0.5     | 0.5     |
| Na <sup>+</sup>                             | 8.2            | 8.2                      | 8.2   | 8.2   | 8.2   | 8.2    | 8.2     | 8.2     | 8.2     |
| Cl <sup>-</sup>                             | 15.3           | 15.3                     | 15.3  | 15.3  | 15.3  | 15.3   | 15.3    | 15.3    | 15.3    |
| Fe                                          | 0.0            | 1.4                      | 1.4   | 1.4   | 1.4   | 2.4    | 2.4     | 2.4     | 2.8     |
| Mn                                          | 0.0            | 0.8                      | 0.8   | 0.8   | 0.8   | 0.8    | 0.8     | 0.8     | 0.8     |
| Zn                                          | 0.0            | 0.3                      | 0.3   | 0.3   | 0.3   | 0.3    | 0.3     | 0.3     | 0.3     |
| B                                           | 0.0            | 0.3                      | 0.3   | 0.3   | 0.3   | 0.3    | 0.3     | 0.3     | 0.3     |
| Cu                                          | 0.0            | 0.1                      | 0.1   | 0.1   | 0.1   | 0.1    | 0.1     | 0.1     | 0.1     |
| CE (dS m <sup>-1</sup> )                    | 2.3            | 2.7                      | 3.3   | 3.0   | 2.8   | 3.4    | 3.0     | 3.1     | 3.1     |

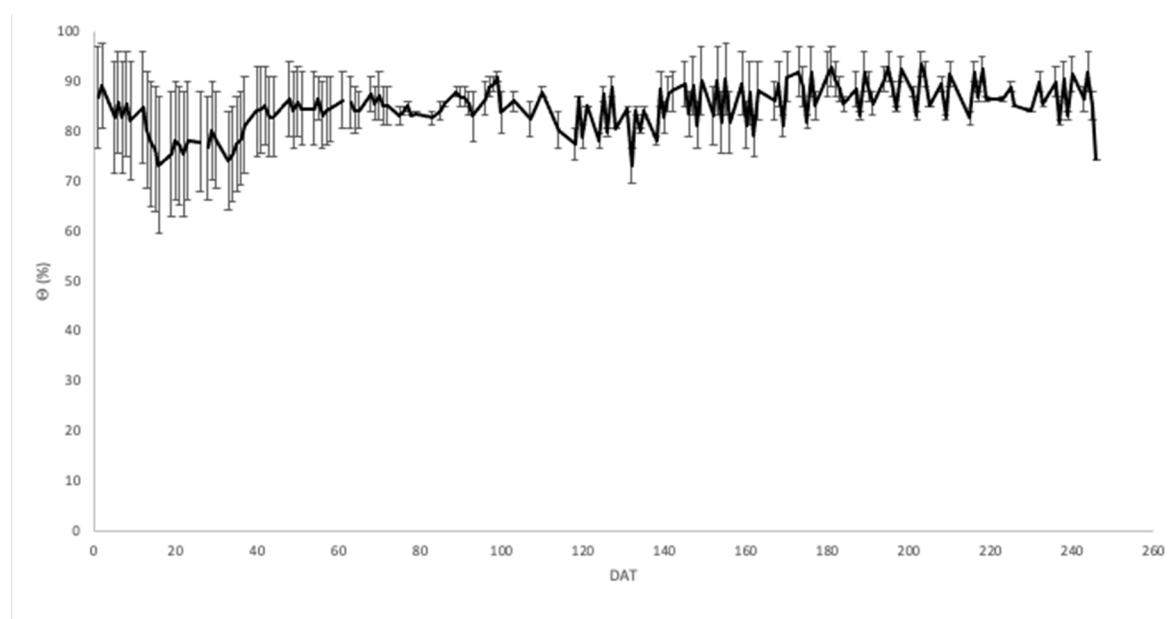

**Figure S1.** Evolution of the relative saturation (Q) of the soil at 5 cm from the emitter, towards the corridor, and 15 cm deep. DAT: Days after transplanting. Data are expressed as percentage of saturation. Error bars indicate  $\pm 1\text{MSE}$ .

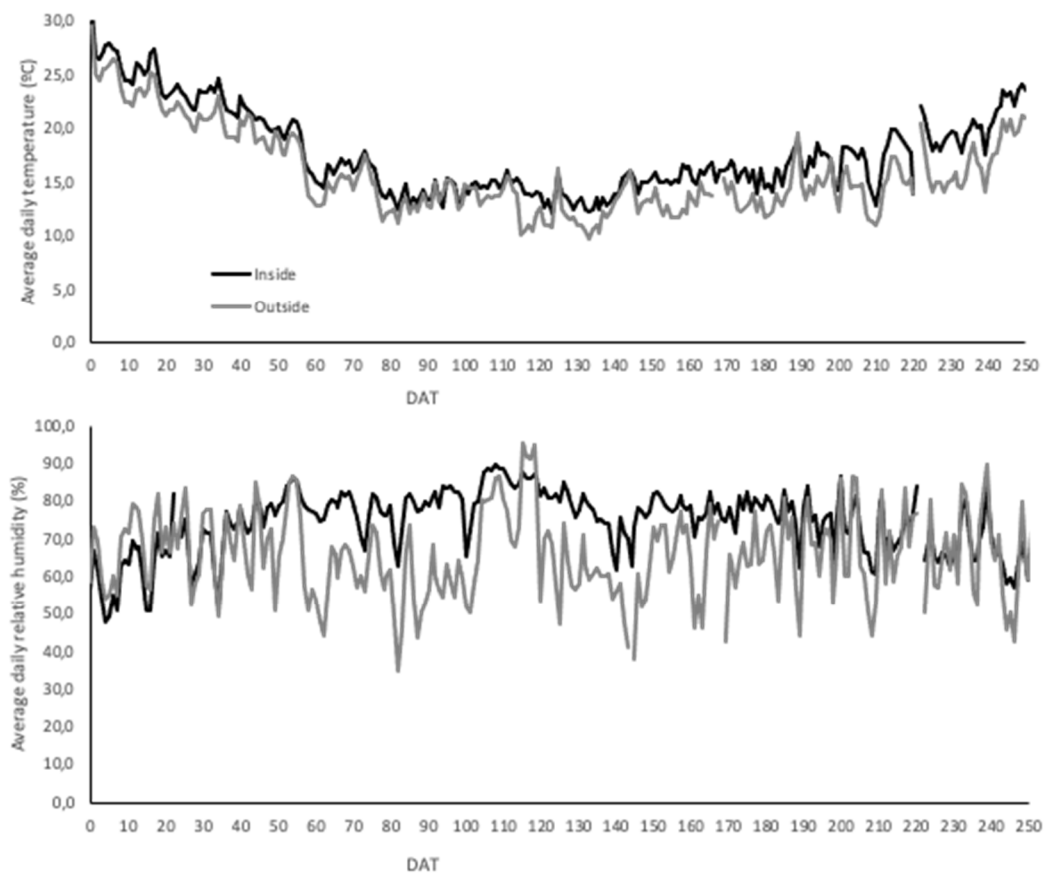

**Figure S2.** Evolution of mean temperature (°C. top) and mean relative humidity (%. bottom) both inside and outside the greenhouse. over the time period of the trials. DAT: Days after transplanting.

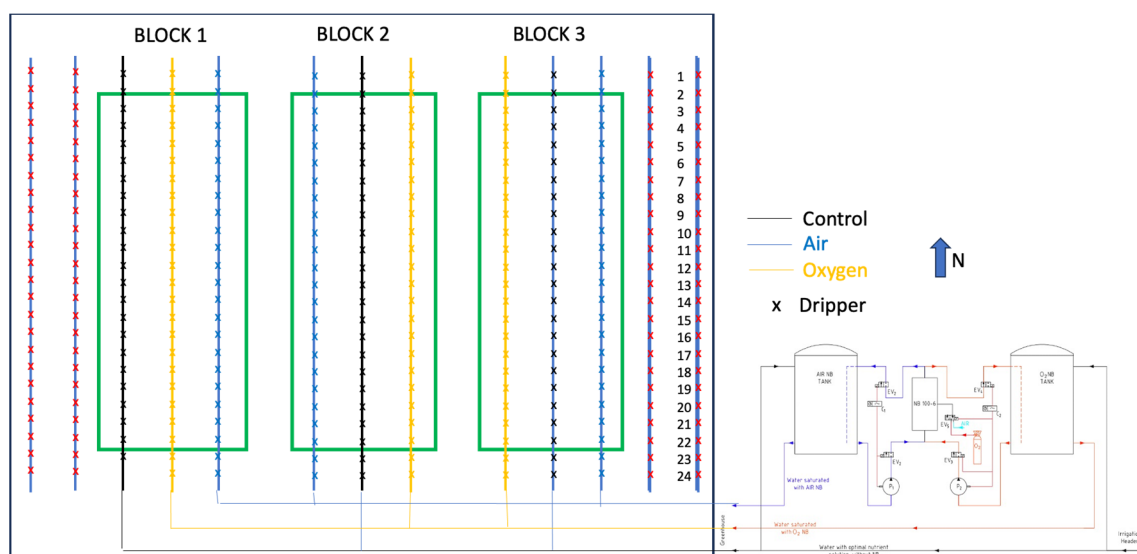

**Figure S3.** Schematic of randomised complete block experimental design.

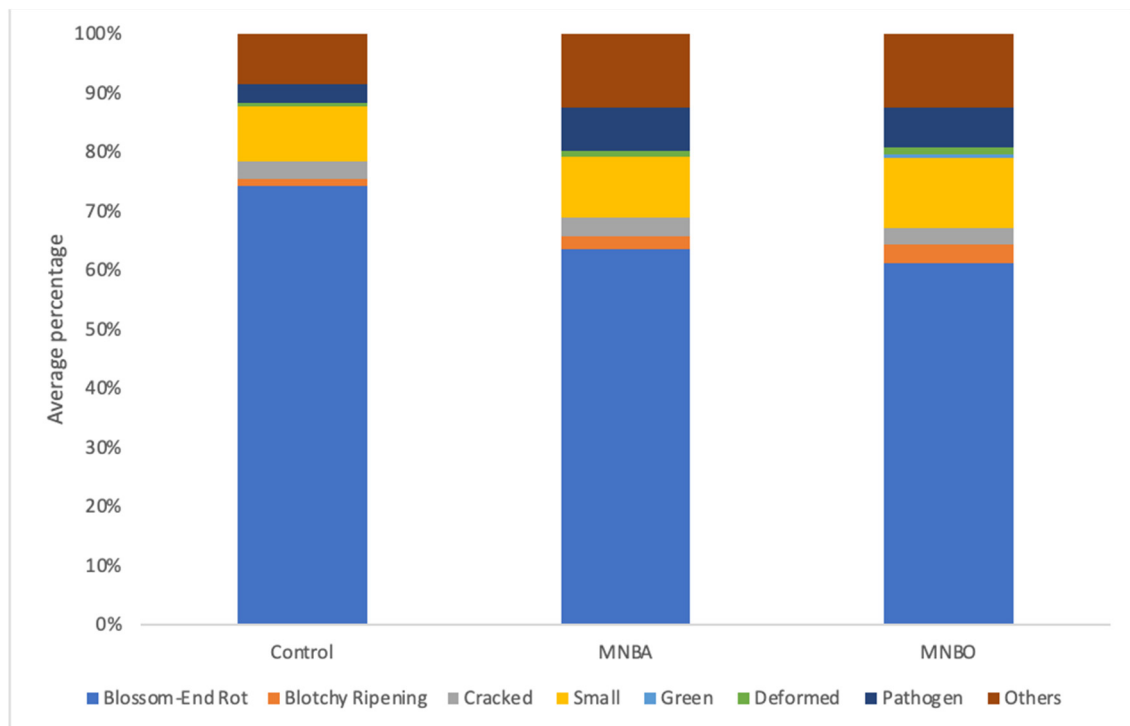

**Figure S4.** Relative percentage of each of the causes of fruit rejection in the unmarketable production for each treatment.
